# Supplementary material for: Tunnel/Pouch versus Coronally Advanced Flap Combined with a Connective Tissue Graft for the Treatment of Maxillary Gingival Recessions: Four-Year Follow-Up of a Randomized Controlled Trial
Source: MDPI journal article supplement (doi:10.3390/jcm9082641), 2020-08-14
Supplement: s1 [file s1]

Supplementary file

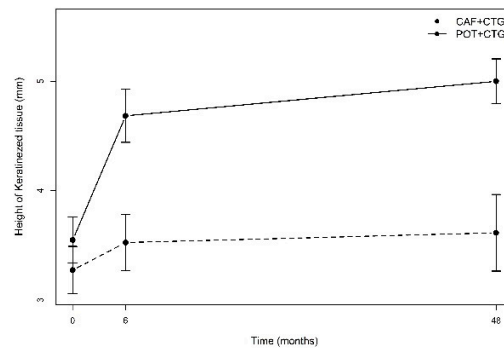

Figure S1 a. Height of keratinized tissue.

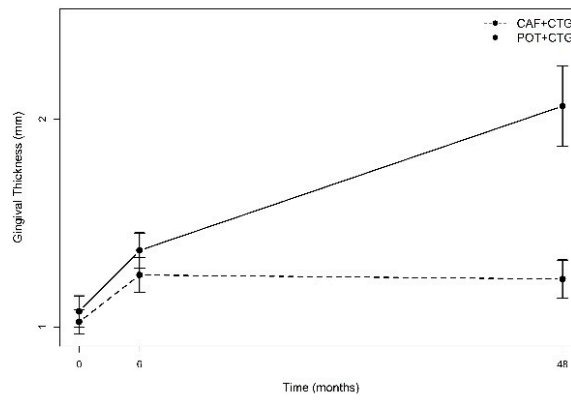

Figure S1 b. Gingival thickness.
